# Supplementary material for: The Impact of Wildfire Smoke on Acute Cardiovascular and Respiratory Illness in the US
Source: Research Square preprint supplement (doi:10.21203/rs.3.rs-9012485/v1), 2026-04-09
Supplement: Supplementary file 1 [file 3ec3e5e149a1b84a74342179.docx]

**The Impact of Wildfire Smoke on Acute Cardiovascular and Respiratory Illness in the US**

**Supplemental Material**

Supplemental Material 1: Inclusion criteria and their respective OMOP-CDM parent concepts.

| **Outcome name** | **Concept ID** | **Concept description** |
| --- | --- | --- |
| **Acute Myocardial Infaction** | 441579 | Acute myocardial infarction of inferoposterior wall |
| 4108217 | Subsequent myocardial infarction |
| 3654465 | Acute myocardial infarction of right ventricle |
| 434376 | Acute myocardial infarction of anterior wall |
| 439693 | True posterior myocardial infarction |
| 46274044 | Acute ST segment elevation myocardial infarction of lateral wall |
| 46270163 | Acute ST segment elevation myocardial infarction due to right coronary artery occlusion |
| 4296653 | Acute ST segment elevation myocardial infarction |
| 45773170 | Subsequent ST segment elevation myocardial infarction of inferior wall |
| 44782769 | Acute myocardial infarction due to left coronary artery occlusion |
| 3661520 | Acute ST segment elevation myocardial infarction due to occlusion of anterior descending branch of left coronary artery |
| 765132 | Subendocardial myocardial infarction |
| 4108677 | Subsequent myocardial infarction of anterior wall |
| 436706 | Acute myocardial infarction of lateral wall |
| 3661643 | Acute ST segment elevation myocardial infarction due to occlusion of mid portion of right coronary artery |
| 444406 | Acute subendocardial infarction |
| 46270161 | Acute ST segment elevation myocardial infarction of posterior wall |
| 45766075 | Acute anterior ST segment elevation myocardial infarction |
| 4178129 | Acute anteroapical myocardial infarction |
| 4119948 | Acute Q wave infarction - widespread |
| 46270162 | Acute ST segment elevation myocardial infarction due to left coronary artery occlusion |
| 46270159 | Acute ST segment elevation myocardial infarction of anterolateral wall |
| 45766114 | Subsequent ST segment elevation myocardial infarction |
| 4329847 | Myocardial infarction |
| 4200113 | Non-Q wave myocardial infarction |
| 45766113 | Subsequent ST segment elevation myocardial infarction of anterior wall |
| 45766241 | Subsequent non-ST segment elevation myocardial infarction |
| 43020460 | Acute ST segment elevation myocardial infarction involving left anterior descending coronary artery |
| 4145721 | Acute non-Q wave infarction |
| 319039 | Acute posterior myocardial infarction |
| 4126801 | Acute Q wave myocardial infarction |
| 35611571 | Acute ST segment elevation myocardial infarction of inferoposterior wall |
| 4051874 | Acute myocardial infarction of posterolateral wall |
| 3661504 | Acute ST segment elevation myocardial infarction due to distal left anterior descending coronary artery occlusion |
| 4270024 | Acute non-ST segment elevation myocardial infarction |
| 45766116 | Acute ST segment elevation myocardial infarction of inferior wall |
| 44782712 | Acute myocardial infarction due to right coronary artery occlusion |
| 438438 | Acute myocardial infarction of anterolateral wall |
| 438170 | Acute myocardial infarction of inferior wall |
| 4303359 | Acute myocardial infarction of septum |
| 46270160 | Acute ST segment elevation myocardial infarction of anteroseptal wall |
| 45771322 | Acute myocardial infarction of inferior wall involving right ventricle |
| 4124686 | Silent myocardial infarction |
| 45766151 | Acute ST segment elevation myocardial infarction of inferior wall involving right ventricle |
| 3661503 | Acute ST segment elevation myocardial infarction due to mid left anterior descending coronary artery occlusion |
| 604427 | Acute ST segment elevation myocardial infarction due to occlusion of circumflex branch of left coronary artery |
| 37309626 | Myocardial infarction due to demand ischemia |
| 4108218 | Subsequent myocardial infarction of inferior wall |
| 312327 | Acute myocardial infarction |
| 438447 | Acute myocardial infarction of inferolateral wall |
| 4011131 | Acute infarction of papillary muscle |
| 35611570 | Acute ST segment elevation myocardial infarction of inferolateral wall |
| 4267568 | Acute anteroseptal myocardial infarction |
| 4173632 | Microinfarct of heart |
| **Asthma** | 4142738 | Moderate persistent asthma |
| 257581 | Acute asthma |
| 45769441 | Acute exacerbation of allergic asthma |
| 46273452 | Acute exacerbation of asthma co-occurrent with allergic rhinitis |
| 4194289 | Asthma - currently active |
| 46273462 | Acute severe exacerbation of moderate persistent allergic asthma |
| 46274059 | Acute severe exacerbation of severe persistent allergic asthma |
| 46269767 | Acute severe exacerbation of asthma co-occurrent with allergic rhinitis |
| 4145356 | Severe persistent asthma |
| 46269777 | Acute severe exacerbation of mild persistent allergic asthma co-occurrent with allergic rhinitis |
| 4138760 | Exacerbation of intermittent asthma |
| 46269802 | Chronic obstructive asthma co-occurrent with acute exacerbation of asthma |
| 46274124 | Acute severe exacerbation of mild persistent allergic asthma |
| 36684328 | Acute severe exacerbation of allergic asthma |
| 46269781 | Mild persistent asthma uncontrolled |
| 46269774 | Severe persistent allergic asthma uncontrolled |
| 45768912 | Exacerbation of severe persistent asthma |
| 37108581 | Severe uncontrolled persistent asthma |
| 4152913 | Severe asthma |
| 37116845 | Acute severe refractory exacerbation of asthma |
| 42538744 | Exacerbation of allergic asthma |
| 45769352 | Acute severe exacerbation of mild persistent asthma |
| 45769351 | Acute severe exacerbation of moderate persistent asthma |
| 45769438 | Acute severe exacerbation of asthma |
| 45769443 | Acute severe exacerbation of intrinsic asthma |
| 45773005 | Acute exacerbation of intrinsic asthma |
| 45769442 | Acute severe exacerbation of immunoglobin E-mediated allergic asthma |
| 317009 | Asthma |
| 46269771 | Acute severe exacerbation of severe persistent asthma co-occurrent with allergic rhinitis |
| 46273539 | Acute bronchospasm |
| 42536208 | Moderate acute exacerbation of asthma |
| 45769350 | Acute severe exacerbation of severe persistent asthma |
| 45768911 | Exacerbation of mild persistent asthma |
| 43530693 | Acute exacerbation of chronic obstructive airways disease with asthma |
| 40481763 | Acute exacerbation of chronic asthmatic bronchitis |
| 45772937 | Exacerbation of moderate persistent asthma |
| 46270028 | Severe persistent asthma co-occurrent with allergic rhinitis |
| 46269790 | Moderate persistent asthma uncontrolled |
| **Atrial fibrillation** | 313217 | Atrial fibrillation |
| 4232691 | Permanent Atrial fibrillation |
| 44782442 | Atrial fibrillation with rapid ventricular response |
| 4199501 | Rapid Atrial fibrillation |
| 4119602 | Non-rheumatic Atrial fibrillation |
| 605092 | Paroxysmal Atrial fibrillation with rapid ventricular response |
| 4232697 | Persistent Atrial fibrillation |
| 4108832 | Atrial fibrillation and flutter |
| 4119601 | Lone Atrial fibrillation |
| 4117112 | Controlled Atrial fibrillation |
| 45768480 | Longstanding persistent Atrial fibrillation |
| 4154290 | Paroxysmal Atrial fibrillation |
| **Cardiac arrest** | 607219 | Cardiac arrest due to procedure |
| 761738 | Cardiac arrest following cardiac surgery |
| 37398951 | Cardiac arrest during surgery |
| 4172822 | Cardiac arrest due to cardiac disorder |
| 4106274 | Neonatal cardiac arrest |
| 4128968 | Circulatory arrest |
| 4309332 | Cardiac arrest as a complication of care |
| 45766074 | Bradycardic cardiac arrest |
| 4120088 | Cardiac arrest with successful resuscitation |
| 44783658 | Cardiorespiratory arrest with successful resuscitation |
| 4311273 | Cardiac arrest during AND/OR resulting from a procedure |
| 4122762 | Electromechanical dissociation |
| 4216773 | Asystole |
| 321042 | Cardiac arrest |
| 4256374 | Cardiorespiratory arrest |
| 4173446 | Cardiac arrest due to respiratory disorder |
| **Cerebral infarction** | 443454 | Cerebral infarction |
| 4145897 | Multiple lacunar infarcts |
| 763015 | Cerebral infarction due to middle cerebral artery occlusion |
| 4146185 | Right sided cerebral infarction |
| 40479572 | Infarct of cerebrum due to iatrogenic cerebrovascular accident |
| 4046360 | Lacunar infarction |
| 4131383 | Infarction of basal ganglia |
| 45767658 | Cerebral infarction due to thrombosis of middle cerebral artery |
| 762935 | Cerebral infarction due to internal carotid artery occlusion |
| 4031045 | Anterior choroidal artery syndrome |
| 4045735 | Anterior cerebral circulation infarction |
| 4077086 | Occipital cerebral infarction |
| 4141405 | Left sided cerebral infarction |
| 4110190 | Cerebral infarction due to embolism of precerebral arteries |
| 4108356 | Cerebral infarction due to embolism of cerebral arteries |
| 46270031 | Cerebral infarction due to occlusion of precerebral artery |
| 4048784 | Anterior cerebral circulation hemorrhagic infarction |
| 762933 | Cerebral infarction due to cerebral artery occlusion |
| 4138327 | Acute lacunar infarction |
| 43531607 | Cerebral infarction due to stenosis of carotid artery |
| 4045737 | Pure motor lacunar infarction |
| 44782773 | Cerebral infarction due to vertebral artery occlusion |
| 37110679 | Cerebral ischemic stroke due to stenosis of extracranial large artery |
| 36717605 | Silent cerebral infarct |
| 46270381 | Cerebral infarction due to stenosis of precerebral artery |
| 4046362 | Hemorrhagic cerebral infarction |
| 4142739 | Thalamic infarction |
| 4298750 | Periventricular hemorrhagic venous infarct |
| 4111714 | Cerebral infarction due to cerebral venous thrombosis, non-pyogenic |
| 4045738 | Pure sensory lacunar infarction |
| 4110189 | Cerebral infarct due to thrombosis of precerebral arteries |
| 46273649 | Cerebral infarction due to occlusion of basilar artery |
| 4043731 | Infarction - precerebral |
| 765515 | Cerebral infarction due to basilar artery stenosis |
| 4043732 | Posterior cerebral circulation hemorrhagic infarction |
| 43530683 | Cerebral infarction due to carotid artery occlusion |
| 762937 | Cerebral infarction due to cerebral venous thrombosis |
| 45772786 | Cerebral infarction due to embolism of middle cerebral artery |
| 4110192 | Cerebral infarction due to thrombosis of cerebral arteries |
| 46270380 | Cerebral infarction due to vertebral artery stenosis |
| 762951 | Cerebral infarction due to anterior cerebral artery occlusion |
| **Chronic Obstructive Pulmonary Disease Exacerbation** | 4110056 | Chronic obstructive pulmonary disease with acute lower respiratory infection |
| 257004 | Acute exacerbation of chronic obstructive airways disease |
| 43530693 | Acute exacerbation of chronic obstructive airways disease with asthma |
| **Heart failure** | 4108245 | Acute left ventricular failure |
| 43022068 | Exacerbation of congestive heart failure |
| 4023479 | Acute congestive heart failure |
| 764871 | Reduced ejection fraction co-occurrent and due to acute on chronic heart failure |
| 442310 | Acute heart failure |
| 40480603 | Acute systolic heart failure |
| 44782733 | Acute on chronic combined systolic and diastolic heart failure |
| 44782718 | Acute combined systolic and diastolic heart failure |
| 4233424 | Acute right-sided heart failure |
| 4111554 | Decompensated cardiac failure |
| 37309625 | Acute on chronic right-sided congestive heart failure |
| 40481043 | Acute on chronic diastolic heart failure |
| 764873 | Reduced ejection fraction co-occurrent and due to acute heart failure |
| 764877 | Acute heart failure co-occurrent with normal ejection fraction |
| 764874 | Acute on chronic heart failure co-occurrent with normal ejection fraction |
| 4267800 | Acute left-sided heart failure |
| 40481042 | Acute diastolic heart failure |
| 4311437 | Decompensated chronic heart failure |
| 4215446 | Acute right-sided congestive heart failure |
| 40480602 | Acute on chronic systolic heart failure |
| 44782655 | Acute exacerbation of chronic congestive heart failure |
| 4327205 | Acute left-sided congestive heart failure |
| **Composite neonatal outcomes** | 4173323 | Extremely low birth weight infant |
| 4171115 | Low birth weight infant |
| 4079858 | Very low birth weight infant |
| 4064286 | Small-for-dates baby |
| 74469 | Light-for-dates without fetal malnutrition |
| 4145947 | Small for gestational age fetus |
| 37016114 | Acute on chronic hypoxemic respiratory failure |
| 318856 | Neonatal respiratory arrest |
| 4006969 | Acute respiratory disease |
| 4106274 | Neonatal cardiac arrest |
| 4317960 | Neonatal respiratory failure |
| 37395564 | Hypoxemic respiratory failure |
| 4256228 | Respiratory failure |
| 36716978 | Acute on chronic hypercapnic respiratory failure |
| 4027553 | Disorder of lower respiratory system |
| 4158346 | Respiratory distress |
| 374748 | Perinatal anoxic-ischemic brain injury |
| 36716741 | Respiratory instability of prematurity |
| 4191650 | Acute respiratory distress |
| 319138 | Respiratory condition of fetus OR newborn |
| 4159149 | Seizures complicating intracranial hemorrhage in the newborn |
| 258866 | Respiratory distress syndrome in the newborn |
| 4129290 | Neonatal cerebral hemorrhage |
| 4171115 | Low birth weight infant |
| 319049 | Acute respiratory failure |
| 4181199 | Neonatal respiratory system disorder |
| 4079858 | Very low birth weight infant |
| 74469 | Light-for-dates without fetal malnutrition |
| 4173177 | Respiratory insufficiency syndrome of newborn |
| 317109 | Respiratory arrest |
| 4064286 | Small-for-dates baby |
| 443618 | Neonatal hypoxemia |
| 318459 | Respiratory insufficiency |
| 320651 | Severe acute respiratory syndrome |
| 4283942 | Bronchopulmonary dysplasia of newborn |
| 46271075 | Acute hypoxemic respiratory failure |
| 439128 | Extreme prematurity of infant |
| 201957 | Necrotizing enterocolitis in fetus OR newborn |
| 4079972 | Intraventricular hemorrhage of prematurity |
| 4145947 | Small for gestational age fetus |
| 4173323 | Extremely low birth weight infant |
| 4172864 | Neonatal cardiac failure |
| 36675035 | Prematurity of infant |
| 443522 | Neonatal bradycardia |
| 4308227 | Neonatal necrotizing enterocolitis |
| 254068 | Disorder of upper respiratory system |
| **Composite obstetric outcomes** | 4034096 | Eclampsia in labor |
| 44784551 | Preterm spontaneous labor with term delivery |
| 4316372 | HELLP syndrome |
| 136760 | Transient hypertension of pregnancy - not delivered |
| 4062906 | Transient hypertension of pregnancy with postnatal complication |
| 4291933 | Chronic hypertension complicating AND/OR reason for care during pregnancy |
| 4273560 | Premature labor |
| 135601 | Pre-eclampsia or eclampsia with pre-existing hypertension - delivered |
| 141084 | Pre-eclampsia or eclampsia with pre-existing hypertension |
| 438490 | Severe pre-eclampsia - delivered |
| 4146627 | Non-proteinuric hypertension of pregnancy |
| 45757788 | Postpartum pregnancy-induced hypertension |
| 4062550 | Pre-eclampsia or eclampsia with pre-existing hypertension with postnatal complication |
| 441922 | Transient hypertension of pregnancy |
| 45757176 | Preterm labor in third trimester with preterm delivery in third trimester |
| 4058536 | Eclampsia with postnatal complication |
| 443700 | Eclampsia |
| 137613 | Eclampsia in pregnancy |
| 138811 | Eclampsia - delivered with postnatal complication |
| 201912 | Renal hypertension complicating pregnancy, childbirth and the puerperium - delivered with postnatal complication |
| 4283352 | Pre-eclampsia added to pre-existing hypertension |
| 132685 | Severe pre-eclampsia - not delivered |
| 4057976 | Severe pre-eclampsia with postnatal complication |
| 439077 | Severe pre-eclampsia - delivered with postnatal complication |
| 141639 | Transient hypertension of pregnancy - delivered with postnatal complication |
| 45757175 | Preterm labor in second trimester with preterm delivery in second trimester |
| 197930 | Renal hypertension complicating pregnancy, childbirth and the puerperium |
| 4116344 | Eclampsia in puerperium |
| 4034094 | Moderate proteinuric hypertension of pregnancy |
| 4167493 | Pregnancy-induced hypertension |
| 35622939 | Postpartum pre-eclampsia |
| 192684 | Renal hypertension complicating pregnancy, childbirth and the puerperium - not delivered |
| 439393 | Pre-eclampsia |
| 433536 | Severe pre-eclampsia |
| 314090 | Mild pre-eclampsia |
| 4289142 | Eclampsia added to pre-existing hypertension |
| 136743 | Pre-eclampsia or eclampsia with pre-existing hypertension - not delivered |
| 36712703 | Preterm labor without delivery |
| 134414 | Pre-eclampsia or eclampsia with pre-existing hypertension - delivered with postnatal complication |
| 137940 | Transient hypertension of pregnancy - delivered |
| 133816 | Eclampsia - delivered |
| 44784550 | Preterm spontaneous labor with preterm delivery |
| 36712702 | Preterm labor with preterm delivery |
| **Pulmonary embolism** | 435026 | Obstetric pulmonary embolism |
| 45768439 | Acute pulmonary embolism |
| 44782767 | Acute deep venous thrombosis of lower extremity as complication of procedure |
| 440417 | Pulmonary embolism |
| 35615055 | Saddle embolus of pulmonary artery with acute cor pulmonale |
| 4121618 | Pulmonary thromboembolism |
| 45768888 | Acute pulmonary thromboembolism |
| 254662 | Pulmonary infarction |
| 762808 | Infarction of lung due to embolus |
| 4119607 | Subacute massive pulmonary embolism |
| 4091708 | Pulmonary air embolism |
| 4120091 | Acute massive pulmonary embolism |
| 36713113 | Saddle embolus of pulmonary artery |
| 43530605 | Pulmonary embolism with pulmonary infarction |

Supplemental Material 2 - Acknowledgements continued

#### **Data Partners with Released Data**

The following institutions whose data is released or pending:

Available: Advocate Health Care Network — UL1TR002389: The Institute for Translational Medicine (ITM) • Aurora Health Care Inc — UL1TR002373: Wisconsin Network For Health Research • Boston University Medical Campus — UL1TR001430: Boston University Clinical and Translational Science Institute • Brown University — U54GM115677: Advance Clinical Translational Research (Advance-CTR) • Carilion Clinic — UL1TR003015: iTHRIV Integrated Translational health Research Institute of Virginia • Case Western Reserve University — UL1TR002548: The Clinical & Translational Science Collaborative of Cleveland (CTSC) • Charleston Area Medical Center — U54GM104942: West Virginia Clinical and Translational Science Institute (WVCTSI) • Children’s Hospital Colorado — UL1TR002535: Colorado Clinical and Translational Sciences Institute • Columbia University Irving Medical Center — UL1TR001873: Irving Institute for Clinical and Translational Research • Dartmouth College — None (Voluntary) Duke University — UL1TR002553: Duke Clinical and Translational Science Institute • George Washington Children’s Research Institute — UL1TR001876: Clinical and Translational Science Institute at Children’s National (CTSA-CN) • George Washington University — UL1TR001876: Clinical and Translational Science Institute at Children’s National (CTSA-CN) • Harvard Medical School — UL1TR002541: Harvard Catalyst • Indiana University School of Medicine — UL1TR002529: Indiana Clinical and Translational Science Institute • Johns Hopkins University — UL1TR003098: Johns Hopkins Institute for Clinical and Translational Research • Louisiana Public Health Institute — None (Voluntary) • Loyola Medicine — Loyola University Medical Center • Loyola University Medical Center — UL1TR002389: The Institute for Translational Medicine (ITM) • Maine Medical Center — U54GM115516: Northern New England Clinical & Translational Research (NNE-CTR) Network • Mary Hitchcock Memorial Hospital & Dartmouth Hitchcock Clinic — None (Voluntary) • Massachusetts General Brigham — UL1TR002541: Harvard Catalyst • Mayo Clinic Rochester — UL1TR002377: Mayo Clinic Center for Clinical and Translational Science (CCaTS) • Medical University of South Carolina — UL1TR001450: South Carolina Clinical & Translational Research Institute (SCTR) • MITRE Corporation — None (Voluntary) • Montefiore Medical Center — UL1TR002556: Institute for Clinical and Translational Research at Einstein and Montefiore • Nemours — U54GM104941: Delaware CTR ACCEL Program • NorthShore University HealthSystem — UL1TR002389: The Institute for Translational Medicine (ITM) • Northwestern University at Chicago — UL1TR001422: Northwestern University Clinical and Translational Science Institute (NUCATS) • OCHIN — INV-018455: Bill and Melinda Gates Foundation grant to Sage Bionetworks • Oregon Health & Science University — UL1TR002369: Oregon Clinical and Translational Research Institute • Penn State Health Milton S. Hershey Medical Center — UL1TR002014: Penn State Clinical and Translational Science Institute • Rush University Medical Center — UL1TR002389: The Institute for Translational Medicine (ITM) • Rutgers, The State University of New Jersey — UL1TR003017: New Jersey Alliance for Clinical and Translational Science • Stony Brook University — U24TR002306 • The Alliance at the University of Puerto Rico, Medical Sciences Campus — U54GM133807: Hispanic Alliance for Clinical and Translational Research (The Alliance) • The Ohio State University — UL1TR002733: Center for Clinical and Translational Science • The State University of New York at Buffalo — UL1TR001412: Clinical and Translational Science Institute • The University of Chicago — UL1TR002389: The Institute for Translational Medicine (ITM) • The University of Iowa — UL1TR002537: Institute for Clinical and Translational Science • The University of Miami Leonard M. Miller School of Medicine — UL1TR002736: University of Miami Clinical and Translational Science Institute • The University of Michigan at Ann Arbor — UL1TR002240: Michigan Institute for Clinical and Health Research • The University of Texas Health Science Center at Houston — UL1TR003167: Center for Clinical and Translational Sciences (CCTS) • The University of Texas Medical Branch at Galveston — UL1TR001439: The Institute for Translational Sciences • The University of Utah — UL1TR002538: Uhealth Center for Clinical and Translational Science • Tufts Medical Center — UL1TR002544: Tufts Clinical and Translational Science Institute • Tulane University — UL1TR003096: Center for Clinical and Translational Science • The Queens Medical Center — None (Voluntary) • University Medical Center New Orleans — U54GM104940: Louisiana Clinical and Translational Science (LA CaTS) Center • University of Alabama at Birmingham — UL1TR003096: Center for Clinical and Translational Science • University of Arkansas for Medical Sciences — UL1TR003107: UAMS Translational Research Institute • University of Cincinnati — UL1TR001425: Center for Clinical and Translational Science and Training • University of Colorado Denver, Anschutz Medical Campus — UL1TR002535: Colorado Clinical and Translational Sciences Institute • University of Illinois at Chicago — UL1TR002003: UIC Center for Clinical and Translational Science • University of Kansas Medical Center — UL1TR002366: Frontiers: University of Kansas Clinical and Translational Science Institute • University of Kentucky — UL1TR001998: UK Center for Clinical and Translational Science • University of Massachusetts Medical School Worcester — UL1TR001453: The UMass Center for Clinical and Translational Science (UMCCTS) • University Medical Center of Southern Nevada — None (voluntary) • University of Minnesota — UL1TR002494: Clinical and Translational Science Institute • University of Mississippi Medical Center — U54GM115428: Mississippi Center for Clinical and Translational Research (CCTR) • University of Nebraska Medical Center — U54GM115458: Great Plains IDeA-Clinical & Translational Research • University of North Carolina at Chapel Hill — UL1TR002489: North Carolina Translational and Clinical Science Institute • University of Oklahoma Health Sciences Center — U54GM104938: Oklahoma Clinical and Translational Science Institute (OCTSI) • University of Pittsburgh — UL1TR001857: The Clinical and Translational Science Institute (CTSI) • University of Pennsylvania — UL1TR001878: Institute for Translational Medicine and Therapeutics • University of Rochester — UL1TR002001: UR Clinical & Translational Science Institute • University of Southern California — UL1TR001855: The Southern California Clinical and Translational Science Institute (SC CTSI) • University of Vermont — U54GM115516: Northern New England Clinical & Translational Research (NNE-CTR) Network • University of Virginia — UL1TR003015: iTHRIV Integrated Translational health Research Institute of Virginia • University of Washington — UL1TR002319: Institute of Translational Health Sciences • University of Wisconsin-Madison — UL1TR002373: UW Institute for Clinical and Translational Research • Vanderbilt University Medical Center — UL1TR002243: Vanderbilt Institute for Clinical and Translational Research • Virginia Commonwealth University — UL1TR002649: C. Kenneth and Dianne Wright Center for Clinical and Translational Research • Wake Forest University Health Sciences — UL1TR001420: Wake Forest Clinical and Translational Science Institute • Washington University in St. Louis — UL1TR002345: Institute of Clinical and Translational Sciences • Weill Medical College of Cornell University — UL1TR002384: Weill Cornell Medicine Clinical and Translational Science Center • West Virginia University — U54GM104942: West Virginia Clinical and Translational Science Institute (WVCTSI)  Submitted: Icahn School of Medicine at Mount Sinai — UL1TR001433: ConduITS Institute for Translational Sciences • The University of Texas Health Science Center at Tyler — UL1TR003167: Center for Clinical and Translational Sciences (CCTS) • University of California, Davis — UL1TR001860: UCDavis Health Clinical and Translational Science Center • University of California, Irvine — UL1TR001414: The UC Irvine Institute for Clinical and Translational Science (ICTS) • University of California, Los Angeles — UL1TR001881: UCLA Clinical Translational Science Institute • University of California, San Diego — UL1TR001442: Altman Clinical and Translational Research Institute • University of California, San Francisco — UL1TR001872: UCSF Clinical and Translational Science Institute  NYU Langone Health Clinical Science Core, Data Resource Core, and PASC Biorepository Core — OTA-21-015A: Post-Acute Sequelae of SARS-CoV-2 Infection Initiative (RECOVER)  Pending: Arkansas Children’s Hospital — UL1TR003107: UAMS Translational Research Institute • Baylor College of Medicine — None (Voluntary) • Children’s Hospital of Philadelphia — UL1TR001878: Institute for Translational Medicine and Therapeutics • Cincinnati Children’s Hospital Medical Center — UL1TR001425: Center for Clinical and Translational Science and Training • Emory University — UL1TR002378: Georgia Clinical and Translational Science Alliance • HonorHealth — None (Voluntary) • Loyola University Chicago — UL1TR002389: The Institute for Translational Medicine (ITM) • Medical College of Wisconsin — UL1TR001436: Clinical and Translational Science Institute of Southeast Wisconsin • MedStar Health Research Institute — None (Voluntary) • Georgetown University — UL1TR001409: The Georgetown-Howard Universities Center for Clinical and Translational Science (GHUCCTS) • MetroHealth — None (Voluntary) • Montana State University — U54GM115371: American Indian/Alaska Native CTR • NYU Langone Medical Center — UL1TR001445: Langone Health’s Clinical and Translational Science Institute • Ochsner Medical Center — U54GM104940: Louisiana Clinical and Translational Science (LA CaTS) Center • Regenstrief Institute — UL1TR002529: Indiana Clinical and Translational Science Institute • Sanford Research — None (Voluntary) • Stanford University — UL1TR003142: Spectrum: The Stanford Center for Clinical and Translational Research and Education • The Rockefeller University — UL1TR001866: Center for Clinical and Translational Science • The Scripps Research Institute — UL1TR002550: Scripps Research Translational Institute • University of Florida — UL1TR001427: UF Clinical and Translational Science Institute • University of New Mexico Health Sciences Center — UL1TR001449: University of New Mexico Clinical and Translational Science Center • University of Texas Health Science Center at San Antonio — UL1TR002645: Institute for Integration of Medicine and Science • Yale New Haven Hospital — UL1TR001863: Yale Center for Clinical Investigation
